# Supplementary material for: Photoactivated transition metal dichalcogenides to boost electron extraction for all-inorganic tri-brominated planar perovskite solar cells
Source: Royal Society of Chemistry journal article supplement (doi:10.1039/d0ta01645d), 2020-01-01
Supplement: d0ta01645d1.pdf [file d0ta01645d1.pdf]

## Supporting Information

### **Photoactivated Transition Metal Dichalcogenides to Boost Electron Extraction for All-Inorganic Tri-Brominated Planar Perovskite Solar Cells**

*Qingwei Zhou,<sup>a</sup> Jian Du,<sup>a</sup> Jialong Duan,<sup>\*a</sup> Yudi Wang,<sup>a</sup> Xiya Yang<sup>a</sup> Yanyan Duan<sup>b</sup> and Qunwei Tang<sup>\*a,c</sup>*

<sup>a</sup> Institute of New Energy Technology, College of Information Science and Technology, Jinan University, Guangzhou 510632, PR China;

<sup>b</sup> State Centre for International Cooperation on Designer Low-Carbon and Environmental Material (SCICDLCEM), School of Materials Science and Engineering, Zhengzhou University, Zhengzhou 450001, PR China;

<sup>c</sup> Joint Laboratory for Deep Blue Fishery Engineering, Qingdao National Laboratory for Marine Science and Technology, Qingdao 266237, PR China.

E-mail: duanjialong@jnu.edu.cn; tangqunwei@jnu.edu.cn

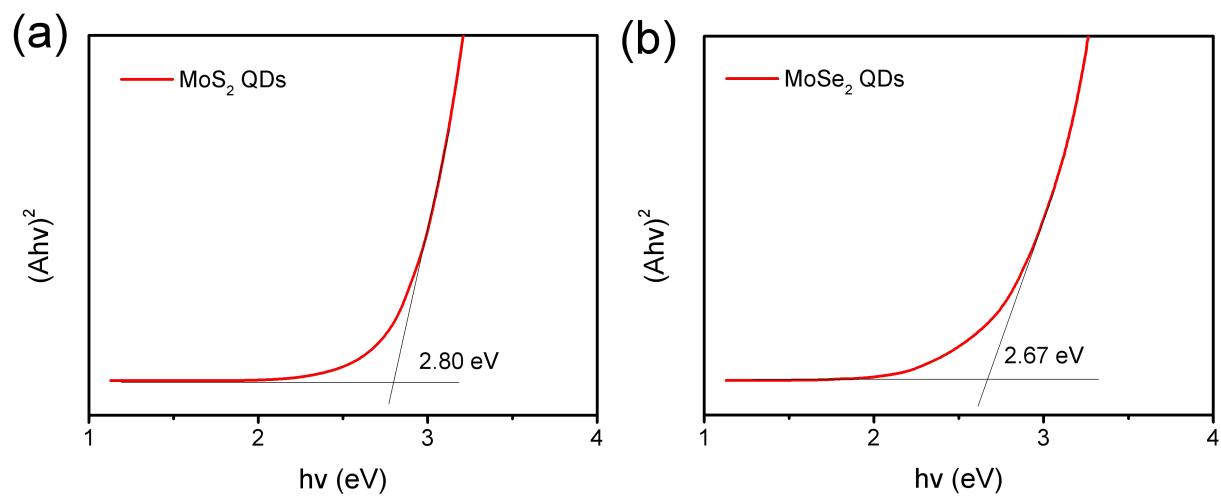

**Fig. S1** UV-vis spectra of (a) MoS<sub>2</sub> QDs and (b) MoSe<sub>2</sub> QDs.

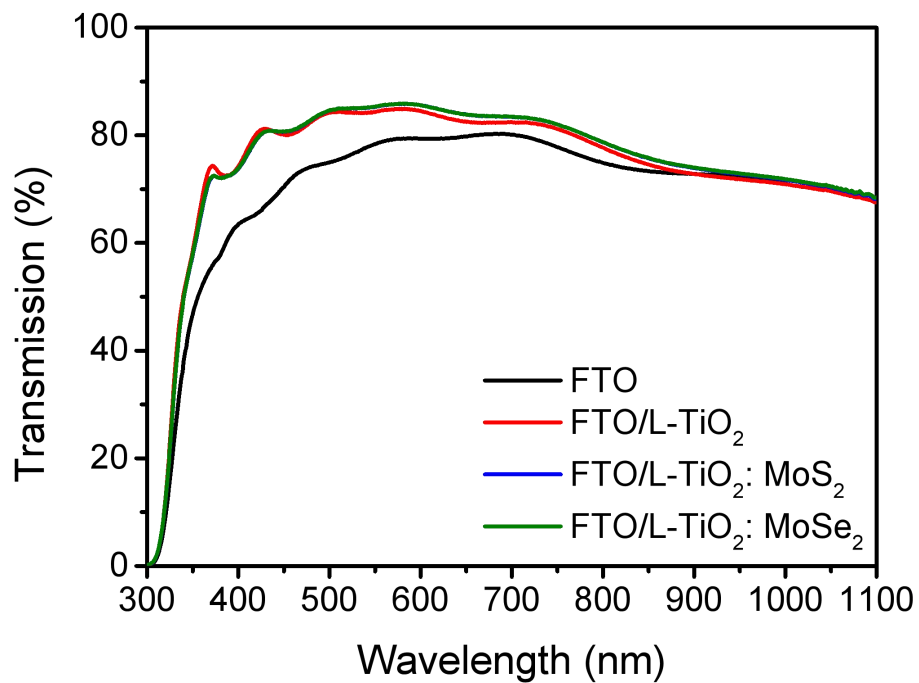

**Fig. S2** Transmission spectra of FTO, FTO/L-TiO<sub>2</sub>, FTO/L-TiO<sub>2</sub>:MoS<sub>2</sub> and FTO/L-TiO<sub>2</sub>:MoSe<sub>2</sub>.

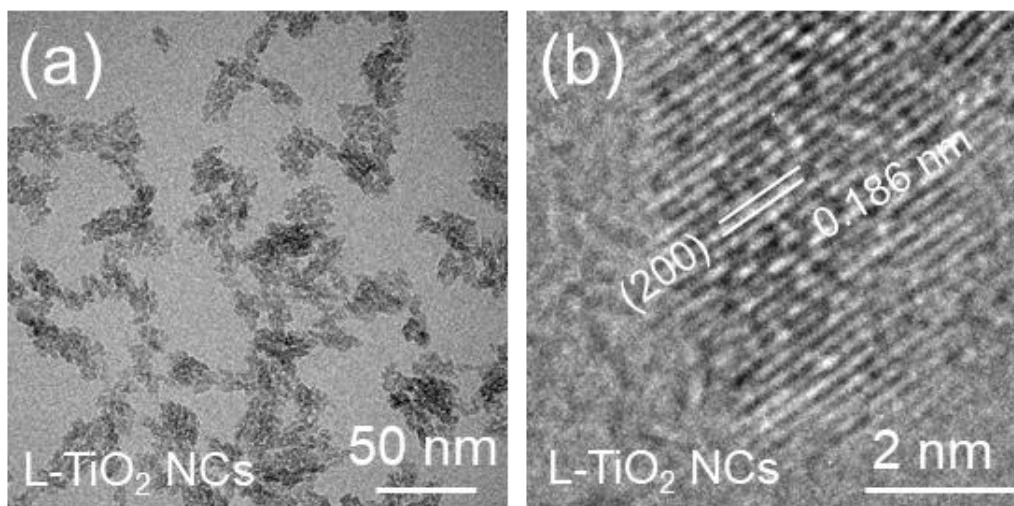

**Fig. S3** (a) TEM and (b) HRTEM images of L-TiO<sub>2</sub> nanocrystals.

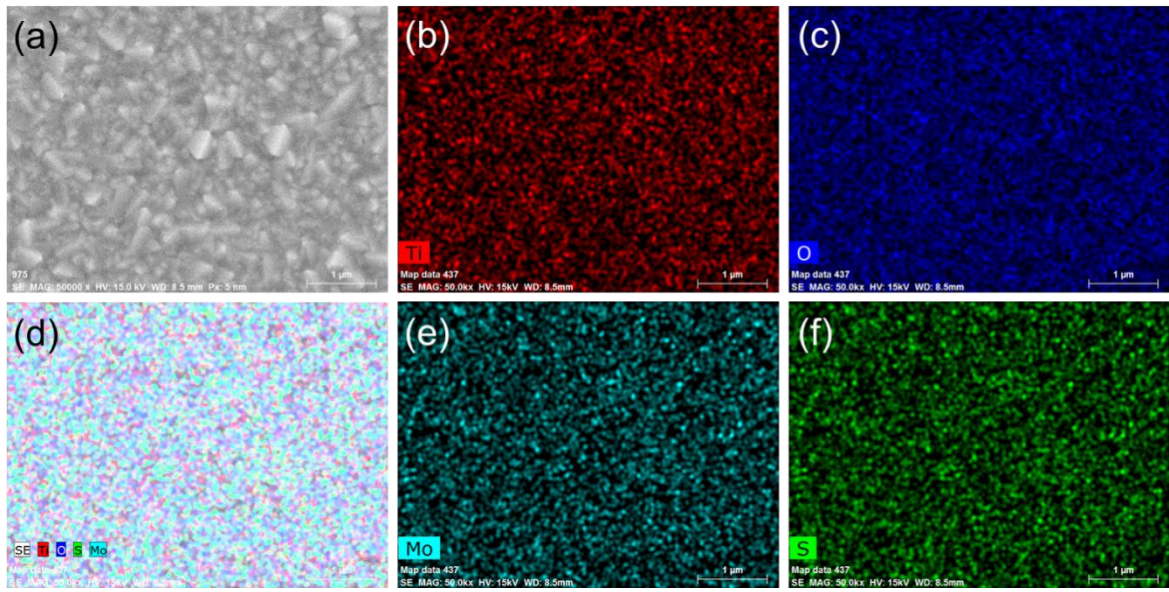

**Fig. S4** EDS mapping images for L-TiO<sub>2</sub>:MoS<sub>2</sub> film.

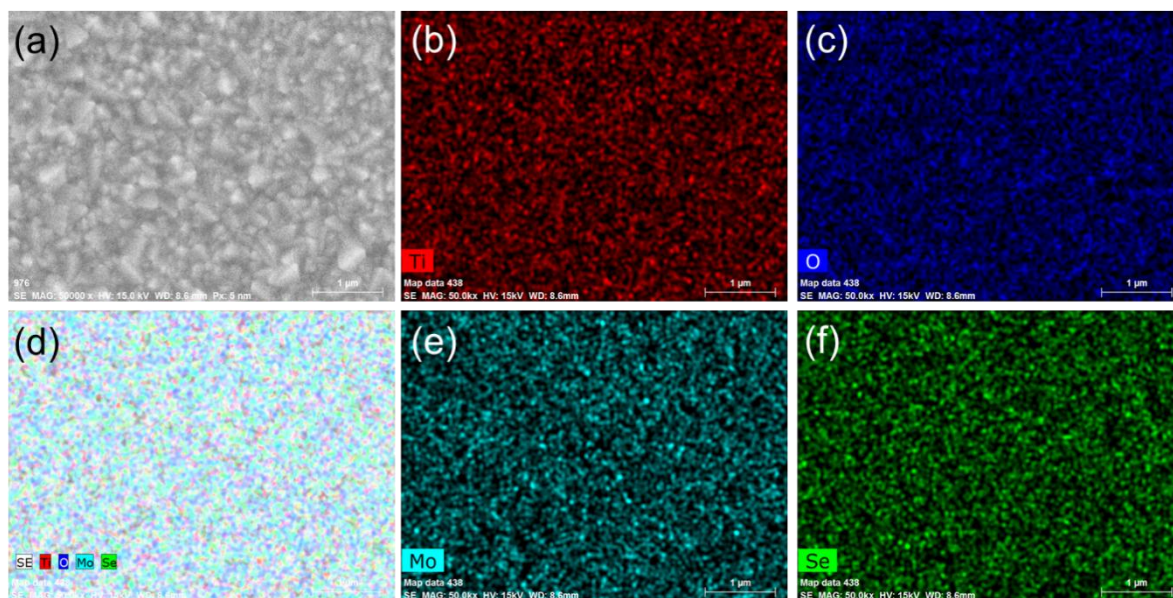

**Fig. S5** EDS mapping images for L-TiO<sub>2</sub>:MoSe<sub>2</sub> film.

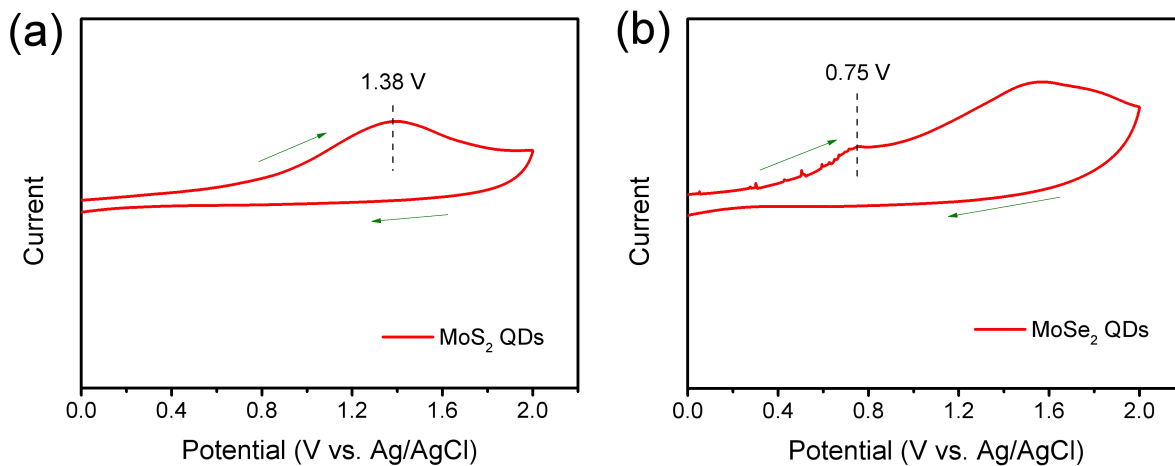

**Fig. S6** CV curves of (a) MoS<sub>2</sub> QDs and (b) MoSe<sub>2</sub> QDs.

According to  $E_{\text{VB}} = -(4.4 + E_{\text{ox,onset}})$  eV, where  $E_{\text{ox,onset}}$  represents the oxidation potential, the VB are determined to be -5.78 and -5.15 eV for MoS<sub>2</sub> and MoSe<sub>2</sub> QDs, respectively. According to their optic band gap (Fig. S1), The CB of MoS<sub>2</sub> and MoSe<sub>2</sub> QDs are determined to be -2.98 and -2.48 eV, respectively, which is higher than that of TiO<sub>2</sub> (~ -4.0 eV).

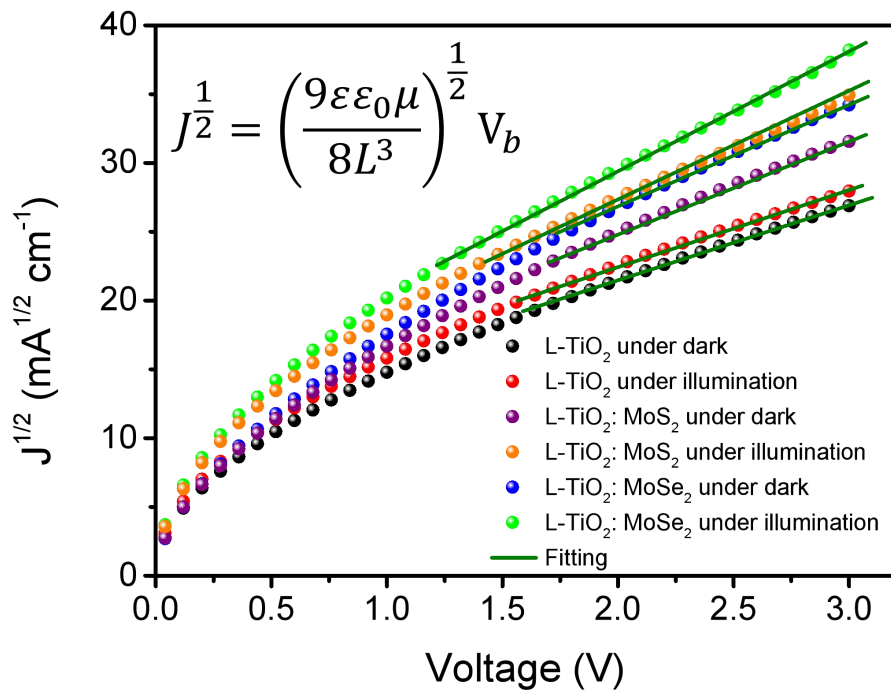

**Fig. S7** Electron mobility for L-TiO<sub>2</sub>, L-TiO<sub>2</sub>:MoS<sub>2</sub> and L-TiO<sub>2</sub>:MoSe<sub>2</sub> ETLs under different conditions using the SCLC model.



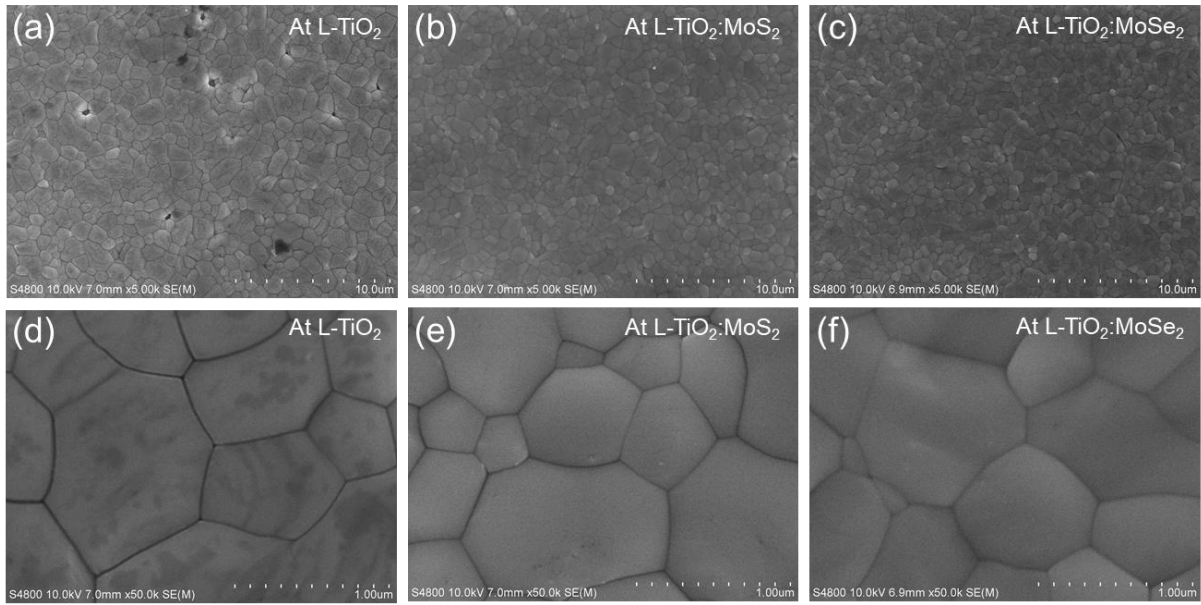

**Fig. S8** SEM images of the CsPbBr<sub>3</sub> films fabricated on the surface of (a, d) L-TiO<sub>2</sub>, (b, e) L-TiO<sub>2</sub>:MoS<sub>2</sub> and (c, f) L-TiO<sub>2</sub>:MoSe<sub>2</sub> ETLs.

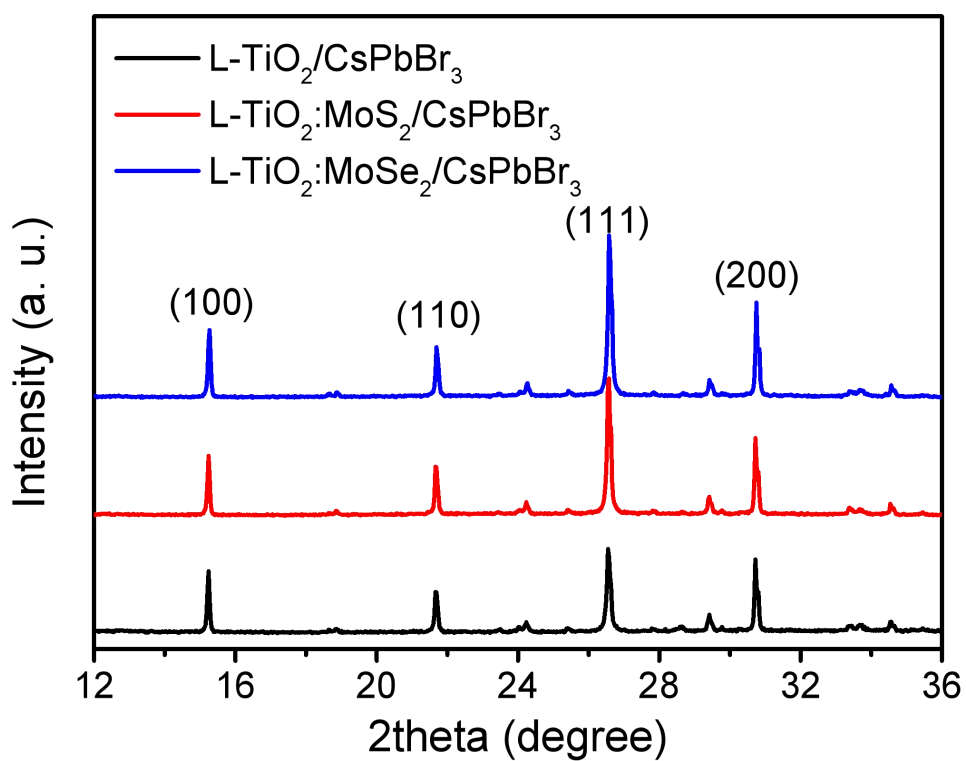

**Fig. S9** XRD patterns of CsPbBr<sub>3</sub> films fabricated on the surface of L-TiO<sub>2</sub>, L-TiO<sub>2</sub>:MoS<sub>2</sub> and L-TiO<sub>2</sub>:MoSe<sub>2</sub> ETLs.

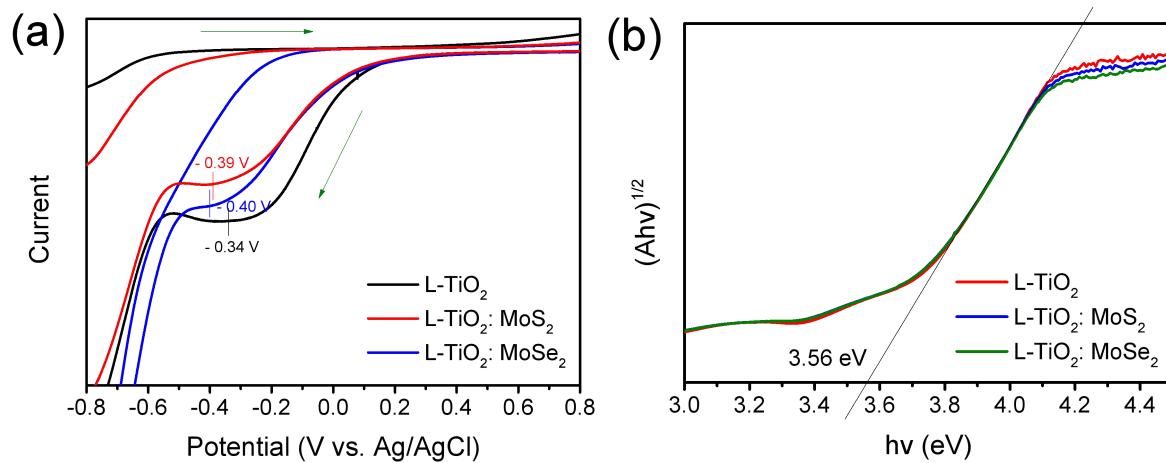

**Fig. S10** (a) CV curves and (b) UV-vis spectra of L-TiO<sub>2</sub>, L-TiO<sub>2</sub>:MoS<sub>2</sub> and L-TiO<sub>2</sub>:MoSe<sub>2</sub> films.

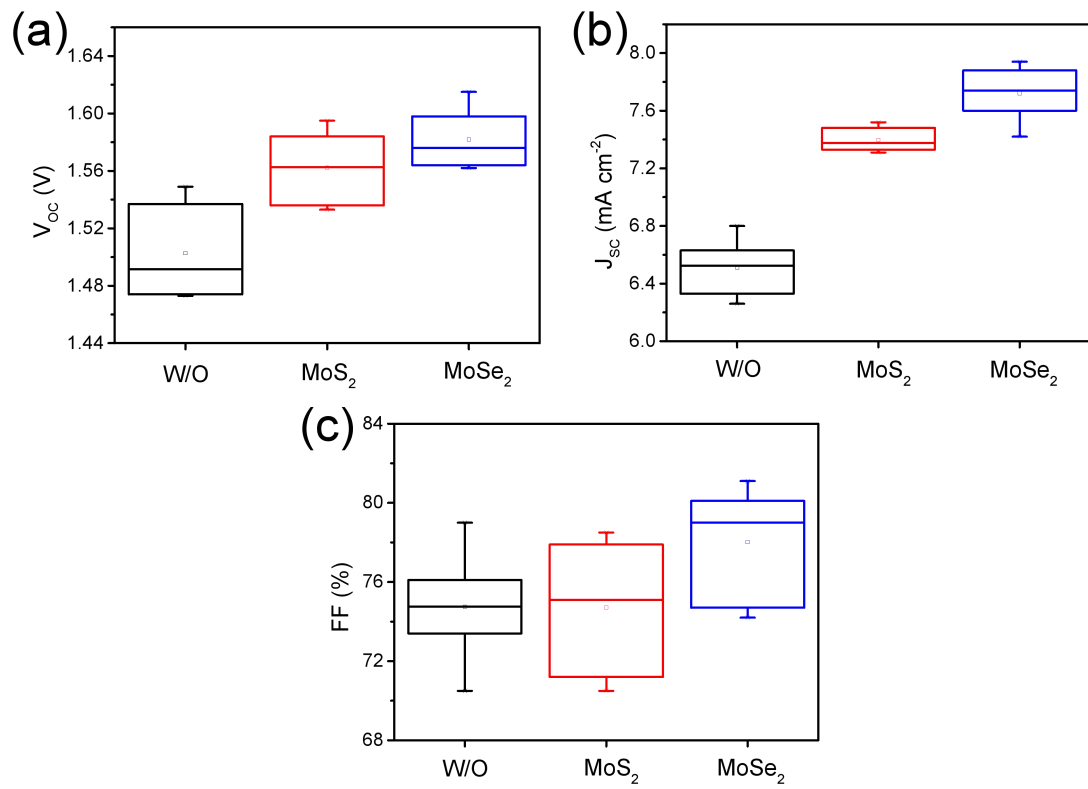

**Fig. S11** The statistical distribution of (a)  $V_{oc}$ , (b)  $J_{sc}$  and (c)  $FF$  for 10 individual devices.

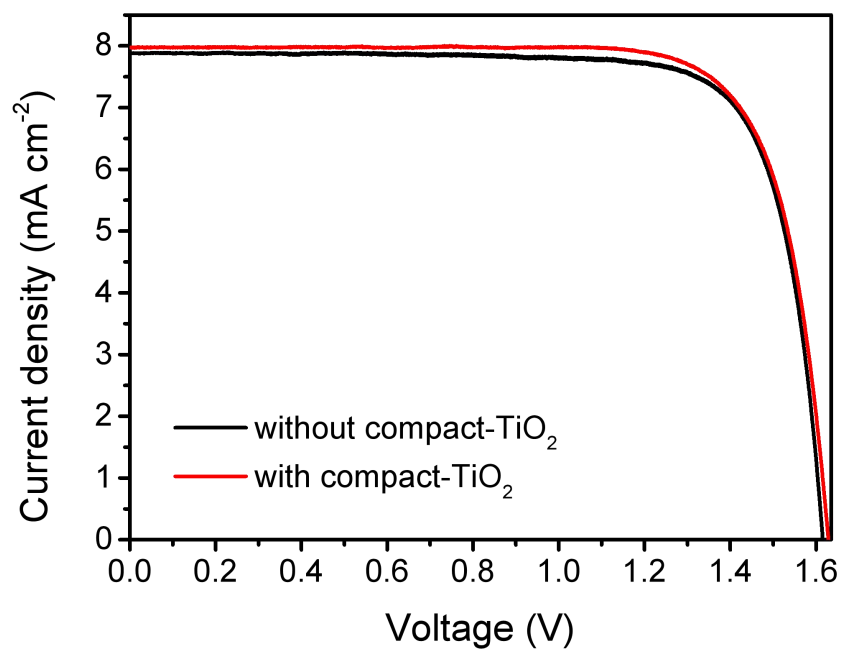

**Fig. S12** The  $J$ - $V$  curves of solar cells with and without compact-TiO<sub>2</sub> layer.

**Table S1** The comparison of photovoltaic parameters for state-of-the-art inorganic CsPbBr<sub>3</sub> PSCs.

| devices                                                                                                                         | $J_{sc}$ (mA cm <sup>-2</sup> ) | PCE (%)      | FF (%)      | $V_{oc}$ (V) | Ref.             |
|---------------------------------------------------------------------------------------------------------------------------------|---------------------------------|--------------|-------------|--------------|------------------|
| <b>FTO/L-TiO<sub>2</sub>:MoSe<sub>2</sub>/CsPbBr<sub>3</sub>/C</b>                                                              | <b>7.88</b>                     | <b>10.02</b> | <b>78.7</b> | <b>1.615</b> | <b>This work</b> |
| FTO/ <i>c</i> -TiO <sub>2</sub> / <i>m</i> -TiO <sub>2</sub> /CsPbBr <sub>3</sub> /PTAA/Au                                      | 6.70                            | 6.20         | 73.0        | 1.25         | S1               |
| FTO/ <i>c</i> -TiO <sub>2</sub> / <i>m</i> -TiO <sub>2</sub> /CsPbBr <sub>3</sub> /C                                            | 5.70                            | 5.00         | 68.0        | 1.29         | S2               |
| FTO/ZnO/CsPbBr <sub>3</sub> -CsPb <sub>2</sub> Br <sub>5</sub> /Spiro-OMeTAD/Au                                                 | 6.17                            | 6.81         | 77.2        | 1.43         | S3               |
| FTO/ <i>c</i> -TiO <sub>2</sub> / <i>m</i> -TiO <sub>2</sub> /CsPbBr <sub>3</sub> /Spiro-OMeTAD/Au                              | 6.52                            | 6.05         | 69.0        | 1.34         | S4               |
| ITO/ZnO/CsPbBr <sub>3</sub> /Spiro-OMeTAD/Au                                                                                    | 6.15                            | 5.98         | 70.51       | 1.38         | S5               |
| FTO/TiO <sub>2</sub> /CQD-CsPbBr <sub>3</sub> IO/Spiro-OMeTAD/Au                                                                | 11.34                           | 8.29         | 69.0        | 1.06         | S6               |
| FTO/ <i>c</i> -TiO <sub>2</sub> / <i>m</i> -TiO <sub>2</sub> /CsPbBr <sub>3</sub> /C                                            | 7.4                             | 6.7          | 73.0        | 1.24         | S7               |
| FTO/ <i>c</i> -TiO <sub>2</sub> /CsPbBr <sub>3</sub> /C                                                                         | 6.46                            | 5.86         | 68.04       | 1.34         | S8               |
| FTO/ <i>mp</i> -TiO <sub>2</sub> /CsPbBr <sub>3</sub> /PTAA/Au                                                                  | 6.16                            | 5.72         | 73          | 1.28         | S9               |
| FTO/ <i>c</i> -TiO <sub>2</sub> / <i>m</i> -TiO <sub>2</sub> /GQDs/CsPbBr <sub>3</sub> /C                                       | 8.12                            | 9.72         | 82.1        | 1.458        | S10              |
| FTO/ <i>c</i> -TiO <sub>2</sub> / <i>m</i> -TiO <sub>2</sub> /Sm <sup>3+</sup> -CsPbBr <sub>3</sub> /C                          | 7.48                            | 10.14        | 85.1        | 1.594        | S11              |
| FTO/SnO <sub>2</sub> /CsPbBr <sub>3</sub> /N-CQDs/C                                                                             | 7.87                            | 10.71        | 80.1        | 1.622        | S12              |
| FTO/ <i>c</i> -TiO <sub>2</sub> / <i>m</i> -TiO <sub>2</sub> /Sm <sup>3+</sup> -CsPbBr <sub>3</sub> /Cu(Cr,Ba)O <sub>2</sub> /C | 7.81                            | 10.79        | 85.5        | 1.615        | S13              |
| FTO/ <i>c</i> -TiO <sub>2</sub> / <i>m</i> -TiO <sub>2</sub> /CsPbBr <sub>3</sub> /CuInS <sub>2</sub> /ZnS                      | 7.73                            | 10.85        | 86.3        | 1.626        | S14              |
| FTO/ <i>c</i> -TiO <sub>2</sub> / <i>m</i> -TiO <sub>2</sub> /Sr <sup>2+</sup> -CsPbBr <sub>3</sub> /C                          | 7.71                            | 9.63         | 81.1        | 1.54         | S15              |
| FTO/ <i>c</i> -TiO <sub>2</sub> / <i>m</i> -TiO <sub>2</sub> /Rb <sup>+</sup> -CsPbBr <sub>3</sub> /C                           | 7.73                            | 9.86         | 82.2        | 1.552        | S16              |
| FTO/ <i>c</i> -TiO <sub>2</sub> / <i>m</i> -TiO <sub>2</sub> /GQDs/CsPbBr <sub>3</sub> /MnS/C                                   | 8.28                            | 10.45        | 83          | 1.52         | S17              |
| FTO/ <i>c</i> -TiO <sub>2</sub> / <i>m</i> -TiO <sub>2</sub> /CsPbBr <sub>3</sub> /Spiro-OMeTAD/Ag                              | 6.4                             | 6.3          | 72          | 1.37         | S18              |
| FTO/TiO <sub>2</sub> /CsPbBr <sub>3</sub> /C                                                                                    | 7.48                            | 6.12         | 68.8        | 1.19         | S19              |

|                                                                                                                                                                         |      |       |       |       |     |
|-------------------------------------------------------------------------------------------------------------------------------------------------------------------------|------|-------|-------|-------|-----|
| FTO/ <i>c</i> -TiO <sub>2</sub> /CsPbBr <sub>3</sub> /C                                                                                                                 | 6.89 | 8.11  | 79    | 1.49  | S20 |
| FTO/ <i>c</i> -TiO <sub>2</sub> /PTI-CsPbBr <sub>3</sub> /spiro-OMeTAD/Ag                                                                                               | 9.78 | 10.91 | 74.47 | 1.498 | S21 |
| FTO/ <i>c</i> -TiO <sub>2</sub> / <i>m</i> -TiO <sub>2</sub> /GQDs/CsPbBr <sub>3</sub> /P3HT/C                                                                          | 7.02 | 6.49  | 68    | 1.36  | S22 |
| FTO/ <i>c</i> -TiO <sub>2</sub> /SnO <sub>2</sub> /CsPbBr <sub>3</sub> /CuPc/C                                                                                          | 8.24 | 8.79  | 81.4  | 1.31  | S23 |
| FTO/ <i>c</i> -TiO <sub>2</sub> /CsPbBr <sub>3</sub> /C                                                                                                                 | 7.37 | 9.35  | 82.2  | 1.545 | S24 |
| FTO/ <i>c</i> -TiO <sub>2</sub> /CsPbBr <sub>3</sub> /Ti <sub>3</sub> C <sub>2</sub> -MXene/C                                                                           | 8.54 | 9.01  | 73.08 | 1.444 | S25 |
| FTO/ <i>c</i> -TiO <sub>2</sub> / <i>m</i> -TiO <sub>2</sub> /Sn <sup>2+</sup> -CsPbBr <sub>3</sub> /C                                                                  | 7.66 | 8.63  | 82.22 | 1.37  | S26 |
| FTO/ <i>c</i> -TiO <sub>2</sub> / <i>m</i> -TiO <sub>2</sub> /CsPbBr <sub>3</sub> /C                                                                                    | 7.40 | 7.37  | 84.1  | 1.22  | S27 |
| FTO/TiO <sub>2</sub> /CsPb <sub>0.998</sub> Co <sub>0.002</sub> Br <sub>3</sub> /Spiro-OMeTAD/Au                                                                        | 7.45 | 8.57  | 84.84 | 1.357 | S28 |
| FTO/ <i>c</i> -TiO <sub>2</sub> /CsPbBr <sub>3</sub> /CsPbBr <sub>3</sub> -CsPb <sub>2</sub> Br <sub>5</sub> /CsPbBr <sub>3</sub> -Cs <sub>4</sub> PbBr <sub>6</sub> /C | 9.26 | 10.17 | 75.39 | 1.461 | S29 |
| FTO/ <i>c</i> -TiO <sub>2</sub> /CsPbBr <sub>3</sub> /spiro-OMeTAD/Au                                                                                                   | 6.97 | 6.95  | 78.5  | 1.27  | S30 |
| FTO/ <i>c</i> -TiO <sub>2</sub> / <i>m</i> -TiO <sub>2</sub> / <i>m</i> -ZrO <sub>2</sub> /CsPbBr <sub>3</sub> / <i>m</i> -carbon                                       | 7.75 | 8.2   | 73.52 | 1.44  | S31 |
| FTO/ <i>c</i> -TiO <sub>2</sub> /CsPbBr <sub>3</sub> -CsPb <sub>2</sub> Br <sub>5</sub> /spiro-OMeTAD/Ag                                                                | 8.48 | 8.34  | 75.9  | 1.296 | S32 |
| FTO/ <i>c</i> -TiO <sub>2</sub> /CsPbBr <sub>3</sub> /spiro-OMeTAD/Au                                                                                                   | 5.6  | 5.4   | 62    | 1.5   | S33 |

**Table S2** Summary of the trap density and mobility in L-TiO<sub>2</sub> with and without TMDCs QDs under different conditions.

| ETL                                   | Conditions   | Trap density (cm <sup>-3</sup> ) | Mobility (cm <sup>2</sup> V <sup>-1</sup> s <sup>-1</sup> ) |
|---------------------------------------|--------------|----------------------------------|-------------------------------------------------------------|
| L-TiO <sub>2</sub>                    | dark         | $9.13 \times 10^{17}$            | $3.48 \times 10^{-4}$                                       |
|                                       | illumination | $8.75 \times 10^{17}$            | $3.66 \times 10^{-4}$                                       |
| L-TiO <sub>2</sub> :MoS <sub>2</sub>  | dark         | $7.27 \times 10^{17}$            | $5.34 \times 10^{-4}$                                       |
|                                       | illumination | $3.04 \times 10^{17}$            | $7.30 \times 10^{-4}$                                       |
| L-TiO <sub>2</sub> :MoSe <sub>2</sub> | dark         | $6.81 \times 10^{17}$            | $6.36 \times 10^{-4}$                                       |
|                                       | illumination | $2.37 \times 10^{17}$            | $8.86 \times 10^{-4}$                                       |



**Table S3.** TRPL decay parameters of various L-TiO<sub>2</sub>/CsPbBr<sub>3</sub> films with and without TMDCs QDs.

| ETLs                                  | $\tau_1$ (ns) | $a_1$  | $\tau_2$ (ns) | $a_2$  | $\tau_{ave}$ (ns) |
|---------------------------------------|---------------|--------|---------------|--------|-------------------|
| L-TiO <sub>2</sub>                    | 1.436         | 37.86% | 11.753        | 62.14% | 3.158             |
| L-TiO <sub>2</sub> :MoS <sub>2</sub>  | 1.212         | 57.65% | 10.338        | 42.35% | 1.935             |
| L-TiO <sub>2</sub> :MoSe <sub>2</sub> | 0.1383        | 68.62% | 5.660         | 31.38% | 0.199             |

## References

- S1 M. Kulbak, S. Gupta, N. Kedem, I. Levine, T. Bendikov, G. Hodes and D. Cahen, *J. Phys. Chem. Lett.*, 2016, **7**, 167–172.
- S2 X. Chang, W. Li, L. Zhu, H. Liu, H. Geng, S. Xiang, J. Liu and H. Chen, *ACS Appl. Mater. Interfaces*, 2016, **8**, 33649–33655.
- S3 X. Zhang, Z. Jin, J. Zhang, D. Bai, H. Bian, K. Wang, J. Sun, Q. Wang and S. F. Liu, *ACS Appl. Mater. Interfaces*, 2018, **10**, 7145–7154.
- S4 K. C. Tang, P. You and F. Yan, *Sol. RRL*, 2018, **2**, 1800075.
- S5 W. Chen, J. Zhang, G. Xu, R. Xue, Y. Li, Y. Zhou, J. Hou and Y. Li, *Adv. Mater.*, 2018, **30**, 1800855.
- S6 S. Zhou, R. Tang and L. Yin, *Adv. Mater.*, 2017, **29**, 1703682.
- S7 J. Liang, C. Wang, Y. Wang, Z. Xu, Z. Lu, Y. Ma, H. Zhu, Y. Hu, C. Xiao, X. Yi, G. Zhu, H. Lv, L. Ma, T. Chen, Z. Tie, Z. Jin and J. Liu, *J. Am. Chem. Soc.*, 2016, **138**, 15829–15832.
- S8 P. Teng, X. Han, J. Li, Y. Xu, L. Kang, Y. Wang, Y. Yang and T. Yu, *ACS Appl. Mater. Interfaces*, 2018, **10**, 9541–9546.
- S9 M. Kulbak, D. Cahen and G. Hodes, *J. Phys. Chem. Lett.*, 2015, **6**, 2452–2456.
- S10 J. Duan, Y. Zhao, B. He and Q. Tang, *Angew. Chem. Int. Ed.*, 2018, **57**, 3787–3791.
- S11 J. Duan, Y. Zhao, X. Yang, Y. Wang, B. He and Q. Tang, *Adv. Energy Mater.*, 2018, **8**, 1802346.
- S12 Y. Zhao, J. Duan, Y. Wang, X. Yang and Q. Tang, *Nano Energy*, 2020, **67**, 104286.
- S13 J. Duan, Y. Zhao, Y. Wang, X. Yang and Q. Tang, *Angew. Chem. Int. Ed.*, 2019, **58**, 16147–16151.
- S14 J. Duan, Y. Wang, X. Yang and Q. Tang, *Angew. Chem. Int. Ed.*, 2020, DOI:10.1002/anie.202000199.
- S15 Y. Zhao, Y. Wang, J. Duan, X. Yang and Q. Tang, *J. Mater. Chem. A*, 2019, **7**, 6877–6882.
- S16 Y. Li, J. Duan, H. Yuan, Y. Zhao, B. He and Q. Tang, *Sol. RRL*, 2018, **2**, 1800164.
- S17 X. Li, Y. Tan, H. Lai, S. Li, Y. Chen, S. Li, P. Xu and J. Yang, *ACS Appl. Mater. Interfaces*, 2019, **11**, 29746–29752.
- S18 H. Wang, Y. Wu, M. Ma, S. Dong, Q. Li, J. Du, H. Zhang and Q. Xu, *ACS Appl. Energy Mater.*, 2019, **2**, 2305–2312.
- S19 X. Cao, G. Zhang, L. Jiang, Y. Cai, Y. Gao, W. Yang, X. He, Q. Zeng, G. Xing, Y. Jia and J. Wei, *ACS Appl. Mater. Interfaces*, 2019, **12**, 5925–5931.
- S20 X. Wan, Z. Yu, W. Tian, F. Huang, S. Jin, X. Yang, Y.-B. Cheng, A. Hagfeldt and L. Sun, *J. Energy Chem.*, 2020, **46**, 8–15.
- S21 G. Tong, T. Chen, H. Li, L. Qiu, Z. Liu, Y. Dang, W. Song, L. K. Ono, Y. Jiang and Y. Qi, *Nano Energy*, 2019, **65**, 104015.
- S22 G. Wang, W. Dong, A. Gurung, K. Chen, F. Wu, Q. He, R. Pathak and Q. Qiao, *J. Power Sources*, 2019, **432**, 48–54.
- S23 X. Liu, X. Tan, Z. Liu, H. Ye, B. Sun, T. Shi, Z. Tang and G. Liao, *Nano Energy*, 2019, **56**, 184–195.
- S24 T. Xiang, Y. Zhang, H. Wu, J. Li, L. Yang, K. Wang, J. Xia, Z. Deng, J. Xiao, W. Li, Z. Ku, F. Huang, J. Zhong, Y. Peng and Y.-B. Cheng, *Sol. Energy Mater. Sol. Cells*, 2019, 110317.
- S25 T. Chen, G. Tong, E. Xu, H. Li, P. Li, Z. Zhu, J. Tang, Y. Qi and Y. Jiang, *J. Mater. Chem. A*, 2019, **7**, 20597–20603.
- S26 H. Guo, Y. Pei, J. Zhang, C. Cai, K. Zhou and Y. Zhu, *J. Mater. Chem. C*, 2019, **7**, 11234–11243.

- S27 D. Huang, P. Xie, Z. Pan, H. Rao and X. Zhong, *J. Mater. Chem. A*, 2019, **7**, 22420–22428.
- S28 D. Wang, W. Li, Z. Du, G. Li, W. Sun, J. Wu and Z. Lan, *J. Mater. Chem. C*, 2020, **8**, 1649–1655.
- S29 G. Tong, T. Chen, H. Li, W. Song, Y. Chang, J. Liu, L. Yu, J. Xu, Y. Qi and Y. Jiang, *Sol. RRL*, 2019, **3**, 1900030.
- S30 J. Lei, F. Gao, H. Wang, J. Li, J. Jiang, X. Wu, R. Gao, Z. Yang and S. (Frank) Liu, *Sol Energy Mater. Solar Cells*, 2018, **187**, 1–8.
- S31 I. Poli, J. Baker, J. McGettrick, F. De Rossi, S. Eslava, T. Watson and P. J. Cameron, *J. Mater. Chem. A*, 2018, **6**, 18677–18686.
- S32 H. Li, G. Tong, T. Chen, H. Zhu, G. Li, Y. Chang, L. Wang and Y. Jiang, *J. Mater. Chem. A*, 2018, **6**, 14255–14261.
- S33 Q. A. Akkerman, M. Gandini, F. Di Stasio, P. Rastogi, F. Palazon, G. Bertoni, J. M. Ball, M. Prato, A. Petrozza and L. Manna, *Nat Energy*, 2017, **2**, 16194.
